# Supplementary material for: Acinetobacter junii: an emerging One Health pathogen
Source: PubMed Central journal article supplement (PMC11237400; doi:10.1128/msphere.00162-24), 2024-04-12
Supplement: msphere.00162-24-s0001.pdf [file msphere.00162-24-s0001.pdf]

### Supplementary File 1

| Strain    | Isolation source | Geographic location    | Collection date | The strain was sensitive to:                                                 | AMR genotype                                            |
|-----------|------------------|------------------------|-----------------|------------------------------------------------------------------------------|---------------------------------------------------------|
| Aj139-038 | Bovine milk      | Cajeme, Sonora, Mexico | September, 2013 | PIP, TZP, TIM, SAM, CTX, CRO, CAZ, FEP, MEM, IPM, AN, GM, TET, CIP, LVX, SXT | No resistance genes were detected by CARD and ResFinder |

Antimicrobial susceptibility testing was performed using the agar disk diffusion method as described in the Clinical and Laboratory Standards Institute M100-Ed32 (CLSI, 2022) for 16 antibiotics. **PIP**: Piperacillin, **SAM**: Ampicillin/Sulbactam, **TZP**: Piperacillin/Tazobactam, **TIM**: Ticarcillin/Clavulanic acid, **CAZ**: Ceftazidime, **FEP**: Cefepime, **CTX**: Cefotaxime, **CRO**: Ceftriaxone, **IPM**: Imipenem, **MEM**: Meropenem, **GM**: Gentamicin, **AN**: Amikacin, **TE**: Tetracycline, **CIP**: Ciprofloxacin, **LVX**: Levofloxacin, **SXT**: Sulfamethoxazole/ Trimethoprim.
