# Supplementary material for: Acinetobacter junii: an emerging One Health pathogen
Source: PubMed Central journal article supplement (PMC11237400; doi:10.1128/msphere.00162-24), 2024-04-12

A

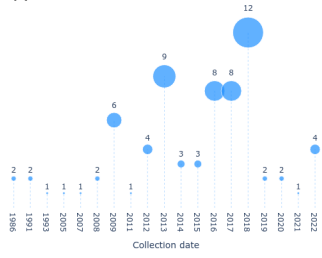

B

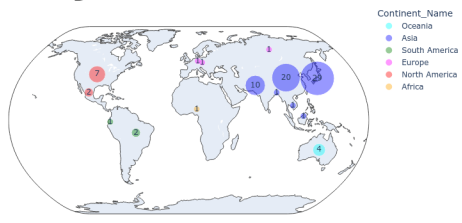

Supplement: msphere.00162-24-s0002.pdf [file msphere.00162-24-s0002.pdf]
