# Supplementary material for: Acinetobacter junii: an emerging One Health pathogen
Source: PubMed Central journal article supplement (PMC11237400; doi:10.1128/msphere.00162-24), 2024-04-12
Supplement: msphere.00162-24-s0005.pdf [file msphere.00162-24-s0005.pdf]

**Supplementary Table 2. ARGs present in plasmids.**

| Sample id       | Strain      | Assembly level  | *ARGs | Host                 | Isolation source                              | Country  | Collection date | *ARGs in predicted plasmid with relaxase or circular status or sequenced |    |     | Genes                                                                                                                                |
|-----------------|-------------|-----------------|-------|----------------------|-----------------------------------------------|----------|-----------------|--------------------------------------------------------------------------|----|-----|--------------------------------------------------------------------------------------------------------------------------------------|
|                 |             |                 |       |                      |                                               |          |                 | plasmids                                                                 | #  | %   |                                                                                                                                      |
| GCF_003939335.2 | AJ_351      | Complete Genome | 14    | Hospital environment | Washroom sink in hospital intensive care unit | Pakistan | 2016            | 1                                                                        | 14 | 100 | tet(X3), APH(3'')-Ib, APH(6)-Id, msrE (2), mphE (2), <b>NDM-1</b> , arr-3, AAC(6')-Ib4, qacEdelta1, sul1, APH(3')-Via, <b>OXA-58</b> |
| GCF_003939355.2 | AJ_068      | Complete Genome | 14    | Hospital environment | Washroom sink in hospital intensive care unit | Pakistan | 2016            | 1                                                                        | 14 | 100 | <b>OXA-58</b> , msrE, mphE, APH(6)-Id (2), AAC(3)-Iid, APH(3')-Via (2), AAC(6')-Ib9, arr-3, <b>NDM-1</b> , sul2, APH(3'')-Ib, floR   |
| GCF_029841885.1 | GD03806     | Contig          | 7     | Hospital environment | Surface swab                                  | Pakistan | 2018            | 1                                                                        | 2  | 29  | mphE, msrE                                                                                                                           |
| GCF_000775815.1 | NBRC 110497 | Contig          | 9     | Human associated     | Human sputum                                  | Japan    | -               | 0                                                                        | 0  | 0   |                                                                                                                                      |
| GCF_009001395.1 | TUM15376    | Contig          | 7     | Human associated     | Human blood                                   | Japan    | 2005            | 0                                                                        | 0  | 0   |                                                                                                                                      |
| GCF_029839935.1 | GD03910     | Contig          | 9     | Water associated     | Remnant water                                 | Pakistan | 2018            | 1                                                                        | 9  | 100 | APH(3')-Via, <b>OXA-235</b> , tet(X3), sul2, msrE, mphE, <b>NDM-1</b> , arr-3, AAC(6')-Ib9                                           |
| GCF_029842155.1 | GD03793     | Contig          | 8     | Water associated     | Remnant water                                 | Pakistan | 2018            | 0                                                                        | 0  | 0   |                                                                                                                                      |
| GCF_004296305.1 | WCHAJ010047 | Contig          | 8     | Water associated     | Sewage                                        | China    | 2015            | 0                                                                        | 0  | 0   |                                                                                                                                      |
| GCF_021384305.1 | T650        | Contig          | 7     | Human associated     | Hospital ICU                                  | China    | 2018            | 0                                                                        | 0  | 0   |                                                                                                                                      |
| GCF_030056035.1 | CAB1309     | Scaffold        | 5     | Human associated     | Blood culture                                 | Nigeria  | 2017            | 0                                                                        | 0  | 0   |                                                                                                                                      |
| GCF_002165245.3 | WCHAJ59     | Complete Genome | 4     | Water associated     | Sewage                                        | China    | 2015            | 1                                                                        | 4  | 100 | AAC(3)-Iid, tet(39), mphE, msrE                                                                                                      |
| GCA_900299105.1 | AM_0608     | Contig          | 3     | Water associated     | Amazon river Upstream section                 | Brazil   | -               | 0                                                                        | 0  | 0   |                                                                                                                                      |
| GCF_029843865.1 | GD03703     | Contig          | 2     | Water associated     | Clean catch water                             | Pakistan | 2018            | 1                                                                        | 2  | 100 | mphE, msrE                                                                                                                           |
| GCA_028614545.1 | mNGS2101_13 | Contig          | 7     | Human associated     | -                                             | China    | 2022            | 1                                                                        | 7  | 100 | <b>NDM-1</b> (2), msrE, tet(39), QnrVC6, AAC(6')-Ib4, qacEdelta1                                                                     |
| GCF_001941805.1 | 65          | Complete Genome | 1     | Water associated     | Limnetic water                                | Russia   | 1991            | 0                                                                        | 0  | 0   |                                                                                                                                      |
| GCF_018336855.1 | YR7         | Complete Genome | 2     | Animal associated    | Feces from chicken farm                       | China    | 2019            | 1                                                                        | 2  | 100 | <b>NDM-1</b> , APH(3')-VIa                                                                                                           |
| GCF_009645695.1 | AMA32       | Scaffold        | 3     | Human associated     | Human                                         | -        | 2017            | 0                                                                        | 0  | 0   |                                                                                                                                      |
| GCF_030016975.1 | CAL11_1     | Contig          | 3     | Human associated     | Blood                                         | Ecuador  | 2022            | 0                                                                        | 0  | 0   |                                                                                                                                      |

\* Antibiotic resistance genes (ARGs)

& Some other ARGs were in the predicted plasmids as per MOB-recon. However, to consider only reliable cases, in addition to the plasmids from complete sequenced genomes, just MOB-suite predicted plasmids with relaxases or circular status were taken into account for counting the ARGs.
